# Supplementary material
Source: Springer Nature journal article supplement (https://www.springermedizin.de/resource/supplementary/12891_2012_1599_MOESM2_ESM.pdf/9508624)
Supplement: MOESM2 [file 9508624]

**Table 1: Criteria for participants in the study**

| <b>Inclusion criteria</b>                              | <b>Exclusion criteria</b>                                               |
|--------------------------------------------------------|-------------------------------------------------------------------------|
| 40 years and older                                     | Inflammatory joint disease                                              |
| Indication for total hip arthroplasty                  | Earlier ipsilateral proximal femur fracture                             |
| Residency within local municipal or willing to commute | Hip pain < 3 months                                                     |
|                                                        | Neuropathy or neuromuscular disease                                     |
|                                                        | Malignant disease                                                       |
|                                                        | Diseases where a moderate level of physical exercise is contraindicated |
|                                                        | Unable to speak or read Danish                                          |
|                                                        | Unable to participate for other reasons                                 |
|                                                        | Refuse to participate                                                   |
